# Supplementary material
Source: publisher figshare collection journal article supplement (https://tandf.figshare.com/articles/dataset/_/9970604)
Supplement: Supplementary file 1 [file 1]

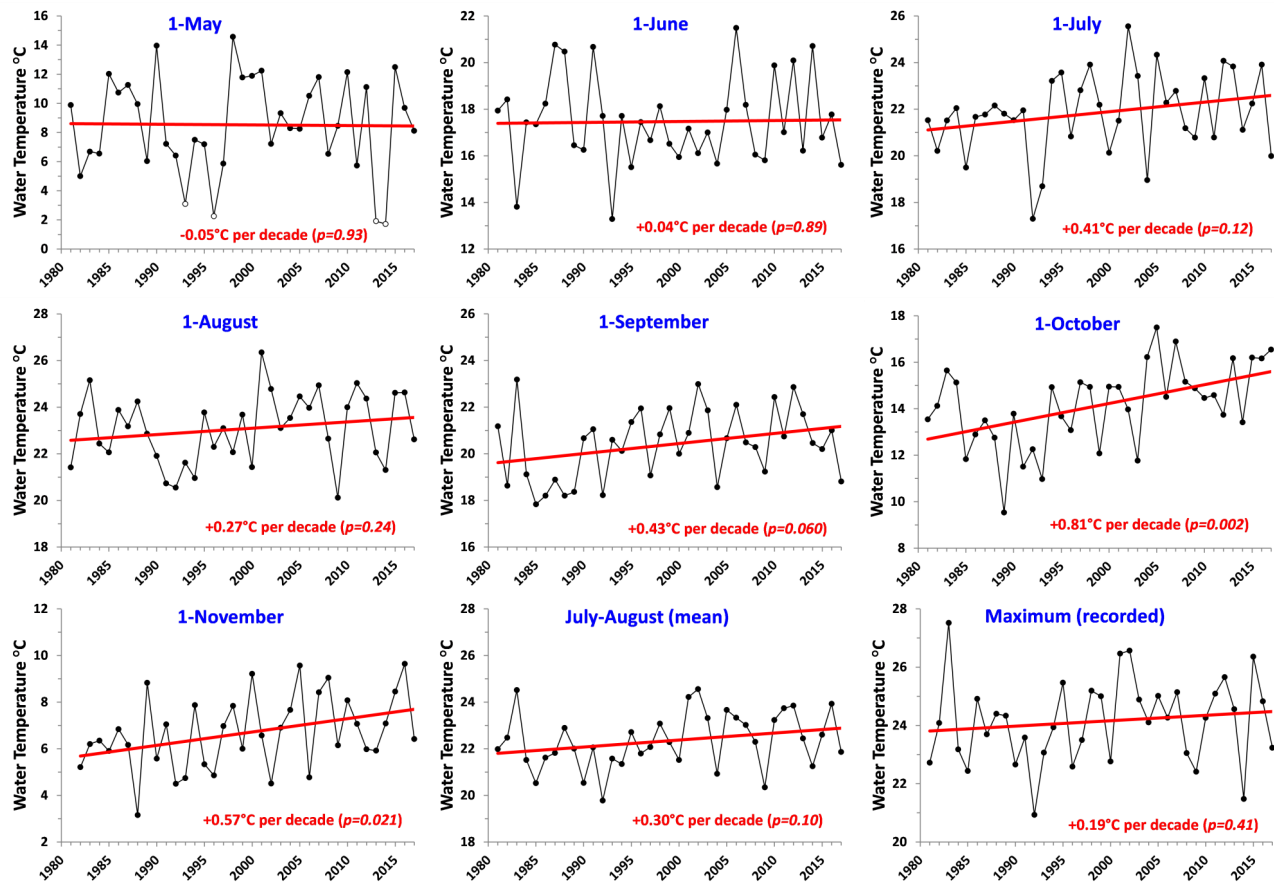

**Supplemental Fig. S3 (Allequash Lake).** Seasonal epilimnetic temperatures (°C) for Allequash Lake (northern Wisconsin), 1981-2017. Trends in °C per decade and their significance are given. The lake was ice-covered on 1-May in years with open circles.
