# Supplementary material
Source: publisher figshare collection journal article supplement (https://tandf.figshare.com/articles/dataset/_/9970604)
Supplement: Supplementary file 2 [file 1]

**Supplemental Table S3.** Linear regression equations to predict each month's starting epilimnetic temperature from the previous monthly mean air temperature are listed under column headings of the seasonal epilimnetic temperature metrics (e.g., April mean air to predict 1-May water temperature, May mean air to predict 1-June water temperature, etc.) for the 12 study lakes. Models to predict July-August mean water temperature from June-August mean air temperature are also tabulated. Range of years used in each lake model is also given.

|                                 | 1-May | 1-June | 1-July | 1-Aug. | 1-Sept. | 1-Oct. | 1-Nov. | July-Aug. |
|---------------------------------|-------|--------|--------|--------|---------|--------|--------|-----------|
| <b>Mendota (1894-2017)</b>      |       |        |        |        |         |        |        |           |
| Slope                           | 0.593 | 0.742  | 0.704  | 0.613  | 0.588   | 0.505  | 0.588  | 0.707     |
| Intercept                       | 4.0   | 5.9    | 8.6    | 10.8   | 10.2    | 9.1    | 5.6    | 9.0       |
| $R^2$                           | 0.54  | 0.49   | 0.40   | 0.39   | 0.46    | 0.43   | 0.71   | 0.60      |
| <b>Mendota (1980-2017)</b>      |       |        |        |        |         |        |        |           |
| Slope                           | 0.542 | 0.760  | 0.524  | 0.782  | 0.575   | 0.662  | 0.507  | 0.780     |
| Intercept                       | 4.6   | 5.8    | 12.2   | 7.1    | 10.6    | 6.4    | 6.4    | 7.6       |
| $R^2$                           | 0.40  | 0.43   | 0.25   | 0.77   | 0.45    | 0.51   | 0.45   | 0.71      |
| <b>Monona (1976-2017)</b>       |       |        |        |        |         |        |        |           |
| Slope                           | 0.540 | 0.770  | 0.528  | 0.770  | 0.605   | 0.644  | 0.619  | 0.749     |
| Intercept                       | 6.3   | 7.0    | 12.8   | 7.7    | 10.3    | 6.9    | 5.0    | 8.6       |
| $R^2$                           | 0.35  | 0.45   | 0.26   | 0.63   | 0.48    | 0.49   | 0.53   | 0.60      |
| <b>Devil's (1986-2017)</b>      |       |        |        |        |         |        |        |           |
| Slope                           | 0.668 | 0.772  | 0.997  | 0.669  | 0.478   | 0.634  | 0.633  | 0.767     |
| Intercept                       | 5.7   | 7.0    | 4.1    | 10.4   | 13.1    | 7.3    | 5.1    | 8.5       |
| $R^2$                           | 0.50  | 0.44   | 0.64   | 0.65   | 0.28    | 0.61   | 0.60   | 0.72      |
| <b>Trout (1981-2017)</b>        |       |        |        |        |         |        |        |           |
| Slope                           | 0.718 | 0.628  | 0.548  | 0.613  | 0.537   | 0.596  | 0.453  | 0.738     |
| Intercept                       | 2.0   | 7.0    | 11.0   | 10.7   | 10.5    | 6.7    | 5.6    | 8.5       |
| $R^2$                           | 0.47  | 0.44   | 0.26   | 0.49   | 0.37    | 0.48   | 0.45   | 0.58      |
| <b>Allequash (1981-2017)</b>    |       |        |        |        |         |        |        |           |
| Slope                           | 1.012 | 0.490  | 0.549  | 0.660  | 0.503   | 0.646  | 0.510  | 0.762     |
| Intercept                       | 4.3   | 11.9   | 12.8   | 10.7   | 11.6    | 5.6    | 3.5    | 9.0       |
| $R^2$                           | 0.46  | 0.29   | 0.22   | 0.49   | 0.23    | 0.34   | 0.36   | 0.54      |
| <b>Sparkling (1981-2017)</b>    |       |        |        |        |         |        |        |           |
| Slope                           | 0.900 | 0.579  | 0.530  | 0.648  | 0.499   | 0.564  | 0.421  | 0.707     |
| Intercept                       | 3.2   | 9.2    | 12.3   | 10.6   | 11.9    | 7.7    | 6.2    | 9.6       |
| $R^2$                           | 0.49  | 0.52   | 0.32   | 0.56   | 0.31    | 0.51   | 0.39   | 0.57      |
| <b>Trout Bog (1981-2017)</b>    |       |        |        |        |         |        |        |           |
| Slope                           | 0.949 | 0.367  | 0.251  | 0.746  | 0.695   | 0.546  | 0.521  | 0.786     |
| Intercept                       | 5.0   | 13.4   | 17.2   | 8.7    | 7.5     | 5.9    | 2.8    | 8.0       |
| $R^2$                           | 0.36  | 0.19   | 0.05   | 0.47   | 0.26    | 0.25   | 0.52   | 0.46      |
| <b>Stechlinsee (1958-2017)</b>  |       |        |        |        |         |        |        |           |
| Slope                           | 0.974 | 0.882  | 0.600  | 0.976  | 0.726   | 0.562  | 0.482  | 1.045     |
| Intercept                       | 1.5   | 4.1    | 9.2    | 3.0    | 6.3     | 7.5    | 6.2    | 1.9       |
| $R^2$                           | 0.62  | 0.56   | 0.23   | 0.74   | 0.58    | 0.65   | 0.48   | 0.65      |
| <b>Hausee (1978, 1985-2017)</b> |       |        |        |        |         |        |        |           |
| Slope                           | 0.882 | 0.779  | 0.566  | 0.770  | 0.735   | 0.585  | 0.542  | 1.063     |
| Intercept                       | 4.6   | 6.6    | 10.5   | 7.0    | 5.9     | 6.7    | 4.7    | 2.2       |
| $R^2$                           | 0.61  | 0.56   | 0.25   | 0.57   | 0.47    | 0.70   | 0.59   | 0.73      |
| <b>Pyhäjärvi (1982-2017)</b>    |       |        |        |        |         |        |        |           |
| Slope                           | -     | 0.800  | 0.861  | 0.659  | 0.884   | 0.572  | 0.709  | 0.918     |
| Intercept                       | -     | 5.2    | 5.4    | 8.7    | 3.1     | 5.2    | 1.1    | 4.6       |
| $R^2$                           | -     | 0.37   | 0.62   | 0.50   | 0.65    | 0.53   | 0.43   | 0.81      |
| <b>Konnevesi (1984-2017)</b>    |       |        |        |        |         |        |        |           |
| Slope                           | -     | 0.724  | 0.406  | 0.722  | 0.935   | 0.592  | -      | 0.945     |
| Intercept                       | -     | 4.2    | 11.1   | 7.4    | 2.6     | 5.4    | -      | 4.1       |
| $R^2$                           | -     | 0.44   | 0.11   | 0.56   | 0.56    | 0.60   | -      | 0.60      |
| <b>Kevojärvi (1962-2017)</b>    |       |        |        |        |         |        |        |           |
| Slope                           | -     | 1.434  | 0.954  | 0.594  | 0.742   | 0.678  | -      | 0.918     |
| Intercept                       | -     | -1.0   | 3.5    | 7.1    | 3.0     | 1.8    | -      | 3.5       |
| $R^2$                           | -     | 0.72   | 0.47   | 0.35   | 0.61    | 0.74   | -      | 0.77      |
