# Supplementary material
Source: publisher figshare collection journal article supplement (https://tandf.figshare.com/articles/dataset/_/9970604)
Supplement: Supplementary file 3 [file 1]

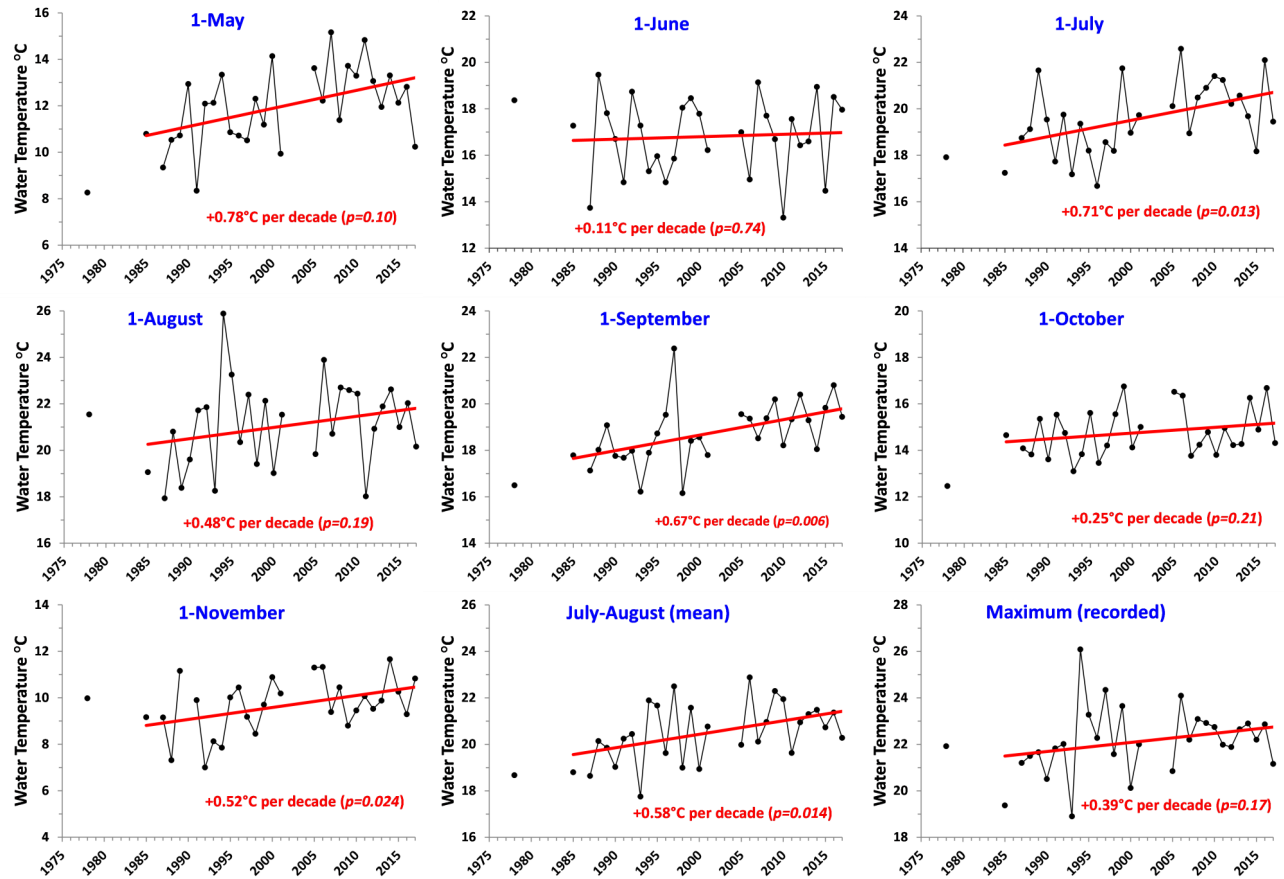

**Supplemental Fig. S5 (Feldberger Haussee).** Seasonal epilimnetic temperatures (°C) for Feldberger Haussee (northeastern Germany), 1985-2017 (plus 1978 data). Trends in °C per decade and their significance are given.
