# Supplementary material
Source: publisher figshare collection journal article supplement (https://tandf.figshare.com/articles/dataset/_/9970604)
Supplement: Supplementary file 4 [file 1]

**Supplemental Table S2.** Statistical summaries of epilimnetic temperature metrics for 3 periods of intensive sampling in Lake Mendota: “Early” (1894-1930), “Mid” (1950-1979), and “Recent” (1980-2017). Statistical differences (*t*-test,  $\alpha=0.05$ , assuming unequal variances) of mean temperatures (°C) between periods are identified for Early vs. Mid (E-M), Mid vs. Recent (M-R), and Early vs. Recent (E-R) periods as: “-” (not significant), “+” ( $p<0.05$ ), and “++” ( $p<0.01$ ). (Note: Early and Mid periods have some years with no temperature metric data.)

|              |          | Temperature Sampling Period |                 |                    | Period Difference |     |     |
|--------------|----------|-----------------------------|-----------------|--------------------|-------------------|-----|-----|
|              |          | Early (1894-1930)           | Mid (1950-1979) | Recent (1980-2017) | E-M               | M-R | E-R |
| 1-May        | mean     | 8.08                        | 8.14            | 9.05               | -                 | -   | ++  |
|              | <i>s</i> | 1.31                        | 1.77            | 1.38               |                   |     |     |
|              | <i>n</i> | 32                          | 13              | 38                 |                   |     |     |
| 1-June       | mean     | 15.50                       | 15.88           | 16.70              | -                 | -   | +   |
|              | <i>s</i> | 2.18                        | 2.08            | 1.99               |                   |     |     |
|              | <i>n</i> | 31                          | 17              | 38                 |                   |     |     |
| 1-July       | mean     | 22.03                       | 22.10           | 22.61              | -                 | -   | -   |
|              | <i>s</i> | 2.03                        | 1.68            | 1.43               |                   |     |     |
|              | <i>n</i> | 30                          | 21              | 38                 |                   |     |     |
| 1-August     | mean     | 23.55                       | 24.23           | 24.46              | -                 | -   | ++  |
|              | <i>s</i> | 1.22                        | 1.62            | 1.33               |                   |     |     |
|              | <i>n</i> | 28                          | 24              | 38                 |                   |     |     |
| 1-September  | mean     | 21.83                       | 22.16           | 22.57              | -                 | -   | +   |
|              | <i>s</i> | 1.17                        | 1.27            | 1.28               |                   |     |     |
|              | <i>n</i> | 30                          | 20              | 38                 |                   |     |     |
| 1-October    | mean     | 17.24                       | 17.27           | 17.29              | -                 | -   | -   |
|              | <i>s</i> | 1.07                        | 0.87            | 1.35               |                   |     |     |
|              | <i>n</i> | 32                          | 19              | 38                 |                   |     |     |
| 1-November   | mean     | 10.76                       | 11.57           | 11.32              | -                 | -   | -   |
|              | <i>s</i> | 1.65                        | 1.40            | 1.27               |                   |     |     |
|              | <i>n</i> | 29                          | 16              | 36                 |                   |     |     |
| July-August  | mean     | 23.22                       | 23.13           | 23.93              | -                 | ++  | ++  |
|              | <i>s</i> | 0.97                        | 0.71            | 1.06               |                   |     |     |
|              | <i>n</i> | 25                          | 19              | 38                 |                   |     |     |
| Max Recorded | mean     | 25.02                       | 25.30           | 25.51              | -                 | -   | -   |
|              | <i>s</i> | 1.41                        | 1.29            | 1.20               |                   |     |     |
|              | <i>n</i> | 24                          | 20              | 38                 |                   |     |     |
