# Supplementary material
Source: publisher figshare collection journal article supplement (https://tandf.figshare.com/articles/dataset/_/9970604)
Supplement: Supplementary file 6 [file 1]

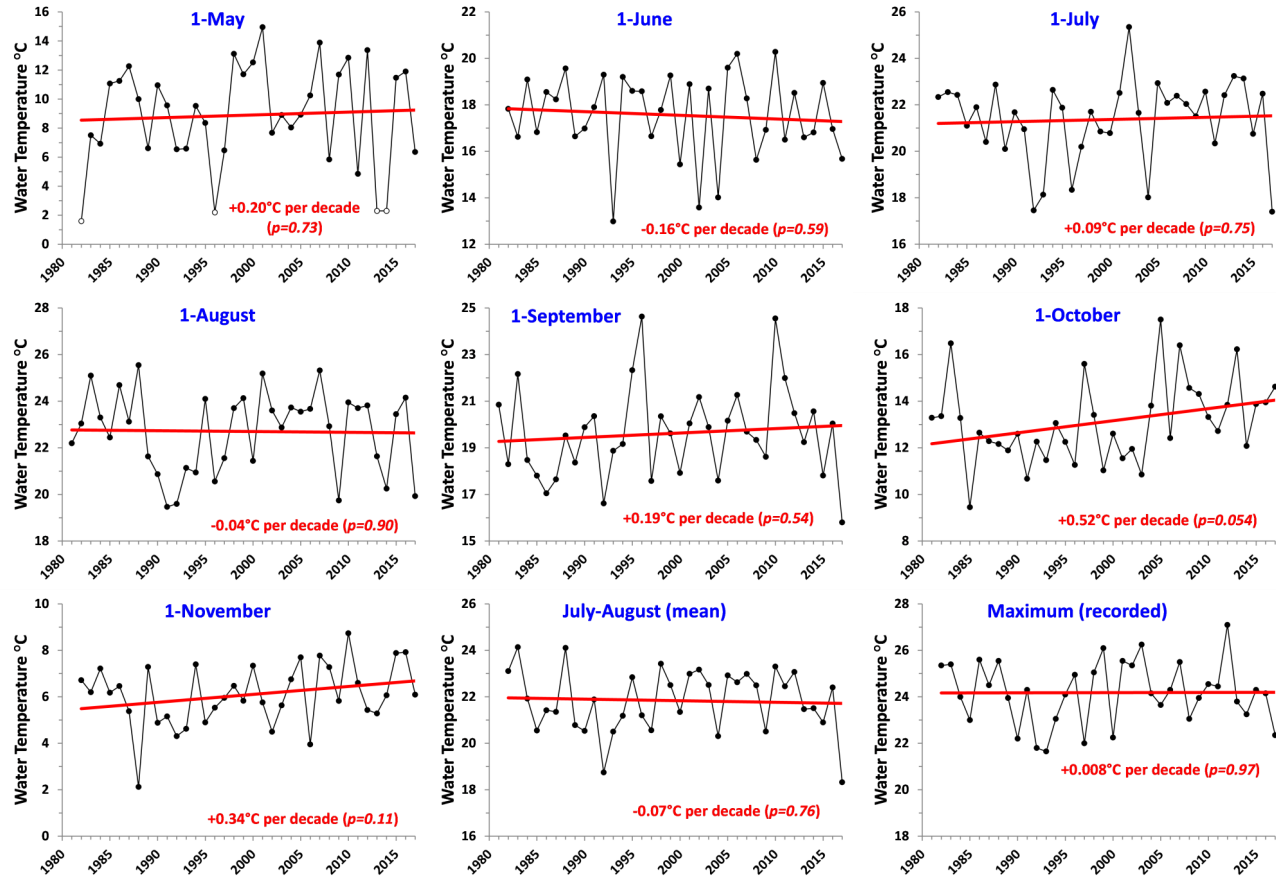

**Supplemental Fig. S10 (Trout Bog).** Seasonal epilimnetic temperatures (°C) for Trout Bog (northern Wisconsin), 1981-2017. Trends in °C per decade and their significance are given. The bog lake was ice-covered on 1-May in years with open circles.
