# Supplementary material
Source: publisher figshare collection journal article supplement (https://tandf.figshare.com/articles/dataset/_/9970604)
Supplement: Supplementary file 7 [file 1]

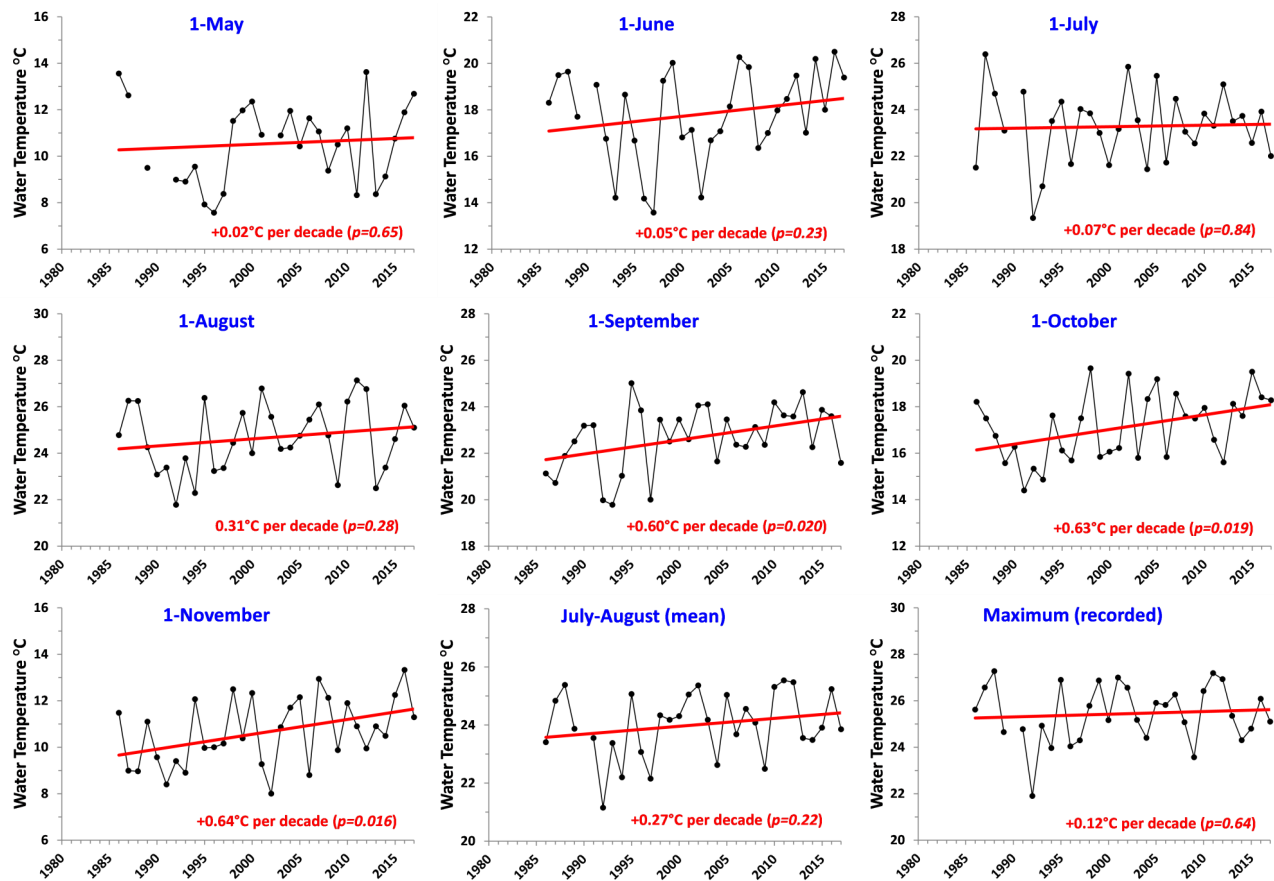

**Supplemental Fig. S4 (Devil's Lake).** Seasonal epilimnetic temperatures (°C) for Devil's Lake (southern Wisconsin), 1985-2017. Trends in °C per decade and their significance are given.
