# Supplementary material
Source: publisher figshare collection journal article supplement (https://tandf.figshare.com/articles/dataset/_/9970604)
Supplement: Supplementary file 8 [file 1]

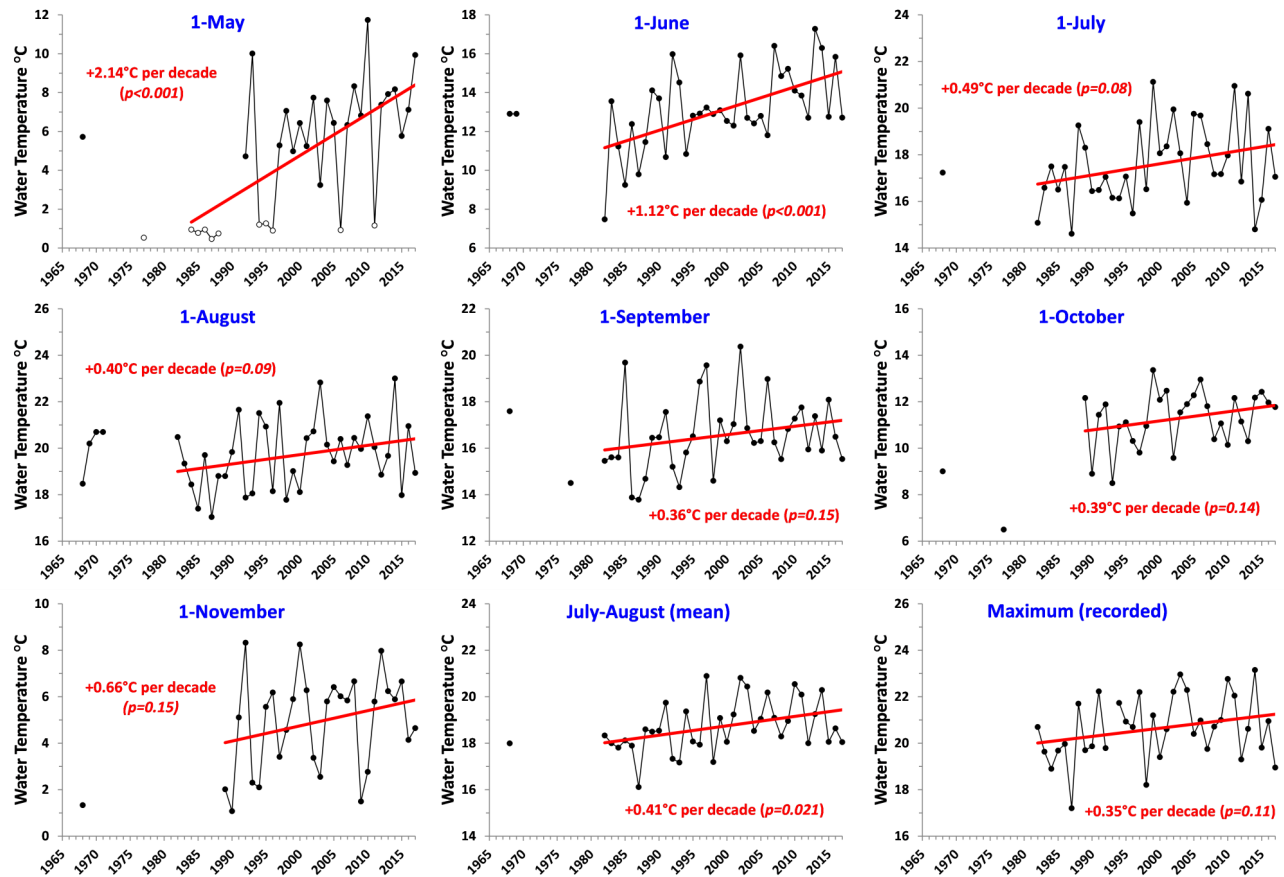

**Supplemental Fig. S8 (Pyhäjärvi).** Seasonal epilimnetic temperatures (°C) for Pyhäjärvi (southwestern Finland), 1982-2017 (with sporadic earlier data plotted). Trends in °C per decade and their significance are given. The lake was ice-covered on 1-May in years with open circles.
