# Supplementary material
Source: publisher figshare collection journal article supplement (https://tandf.figshare.com/articles/dataset/_/9970604)
Supplement: Supplementary file 10 [file 1]

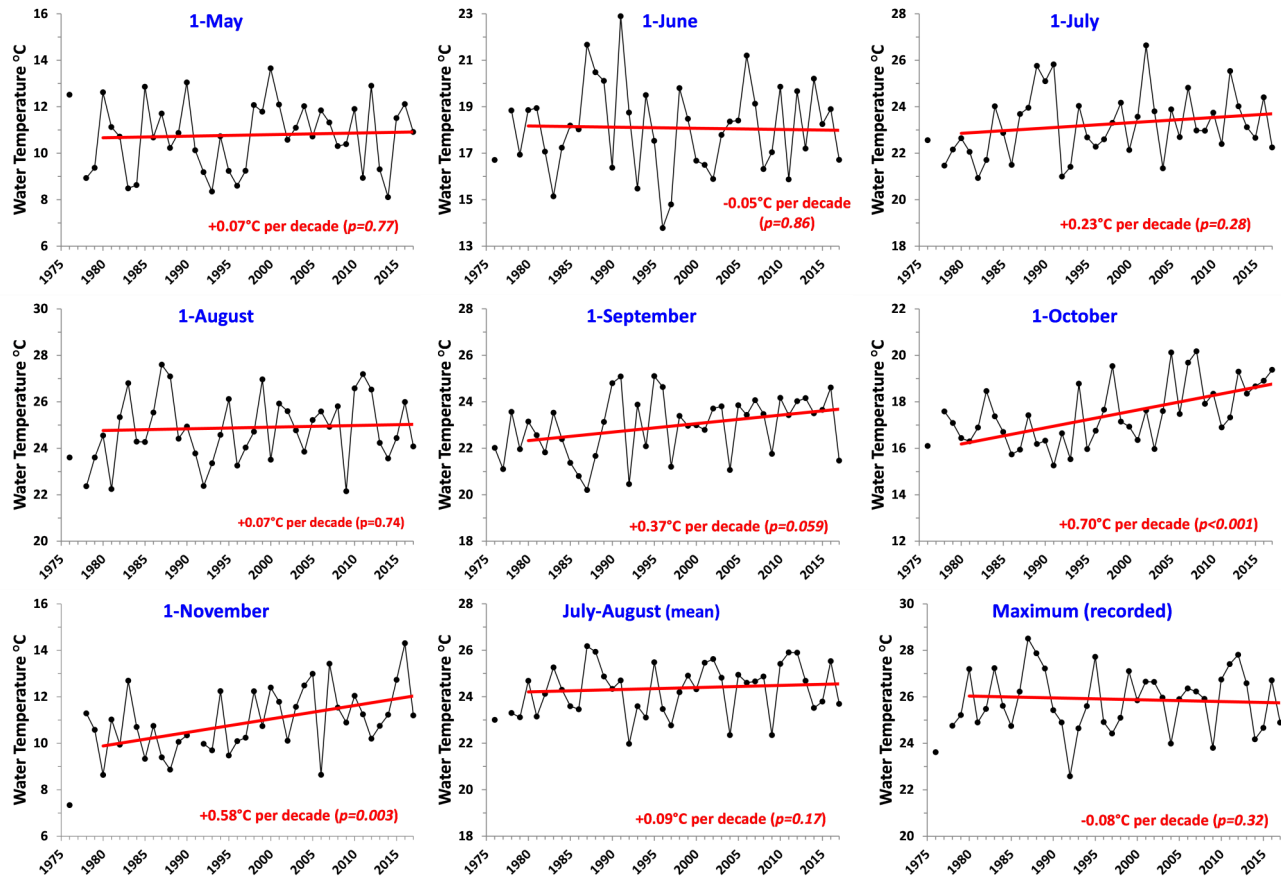

**Supplemental Fig. S7 (Lake Monona).** Seasonal epilimnetic temperatures (°C) for Lake Monona (southern Wisconsin), 1976-2017. Trends in °C per decade and their significance are given for 1980-2017.
