# Supplementary material
Source: publisher figshare collection journal article supplement (https://tandf.figshare.com/articles/dataset/_/9970604)
Supplement: Supplementary file 11 [file 1]

## Devil's Lake - 2006

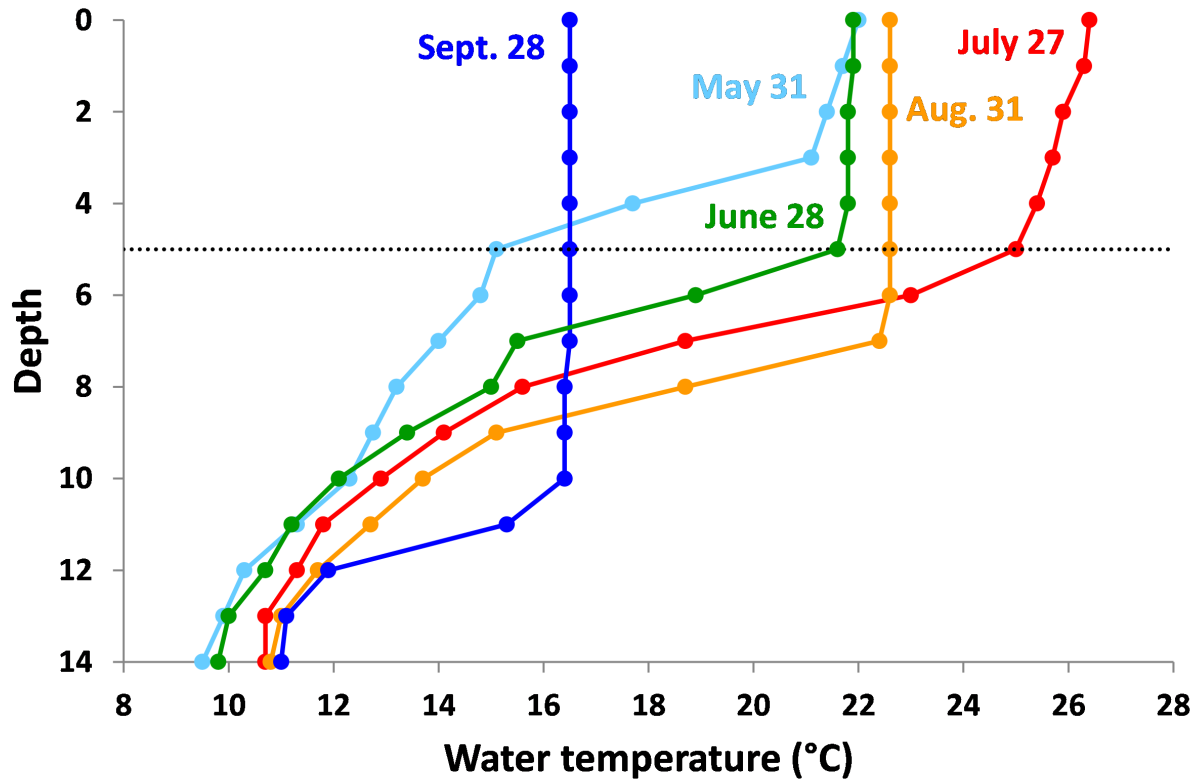

**Supplemental Fig. S1.** Devil's Lake vertical temperature profiles. Profiles were selected from 2006 samplings to illustrate elevated surface temperatures recorded during ephemeral periods of especially warm/hot calm weather in spring (May 31) and summer (July 27) contrasted with uniform epilimnetic temperatures recorded during early summer (June 28), and during late summer (August 31) and fall (September 28) when the lake was losing heat. The dotted horizontal line is the 5-meter epilimnetic depth zone before thermocline deepening began in late summer.
