# Supplementary material
Source: publisher figshare collection journal article supplement (https://tandf.figshare.com/articles/dataset/_/9970604)
Supplement: Supplementary file 13 [file 1]

**Supplemental Table S1.** Statistical summaries of seasonal epilimnetic temperature metrics (°C) for the 12 study lakes from the early 1980s through 2017.

|                              | 1-May | 1-Jun | 1-Jul | 1-Aug | 1-Sep | 1-Oct | 1-Nov | July-Aug<br>(mean) | Maximum<br>Recorded |
|------------------------------|-------|-------|-------|-------|-------|-------|-------|--------------------|---------------------|
| <b>Mendota (1980-2017)</b>   |       |       |       |       |       |       |       |                    |                     |
| Maximum                      | 11.7  | 21.7  | 25.7  | 27.7  | 24.4  | 19.8  | 14.5  | 25.9               | 27.9                |
| 75% Quartile                 | 10.1  | 18.0  | 23.4  | 25.2  | 23.7  | 18.2  | 12.3  | 24.5               | 26.2                |
| Median                       | 9.0   | 16.7  | 22.6  | 24.1  | 23.0  | 17.0  | 11.3  | 24.1               | 25.5                |
| 25% Quartile                 | 7.9   | 15.3  | 21.9  | 23.7  | 21.4  | 16.4  | 10.6  | 23.3               | 24.9                |
| Minimum                      | 6.6   | 12.6  | 19.6  | 21.6  | 19.9  | 14.9  | 8.9   | 21.5               | 23.0                |
| Mean                         | 9.0   | 16.7  | 22.6  | 24.5  | 22.6  | 17.3  | 11.3  | 23.9               | 25.5                |
| Std. Deviation               | 1.4   | 2.0   | 1.4   | 1.3   | 1.3   | 1.4   | 1.3   | 1.1                | 1.2                 |
| <b>Monona (1980-2017)</b>    |       |       |       |       |       |       |       |                    |                     |
| Maximum                      | 13.7  | 22.9  | 26.6  | 27.6  | 25.1  | 20.2  | 14.3  | 26.2               | 28.5                |
| 75% Quartile                 | 11.9  | 19.4  | 24.0  | 25.9  | 23.9  | 18.4  | 12.0  | 25.2               | 26.7                |
| Median                       | 10.8  | 18.2  | 23.1  | 24.7  | 23.4  | 17.3  | 10.8  | 24.6               | 25.9                |
| 25% Quartile                 | 9.5   | 16.7  | 22.3  | 24.0  | 21.9  | 16.4  | 10.1  | 23.6               | 24.9                |
| Minimum                      | 8.1   | 13.8  | 20.9  | 22.2  | 20.2  | 15.3  | 8.6   | 22.0               | 22.6                |
| Mean                         | 10.8  | 18.1  | 23.3  | 24.9  | 23.0  | 17.5  | 11.0  | 24.4               | 25.9                |
| Std. Deviation               | 1.5   | 2.0   | 1.4   | 1.4   | 1.3   | 1.3   | 1.4   | 1.1                | 1.3                 |
| <b>Devil's (1986-2017)</b>   |       |       |       |       |       |       |       |                    |                     |
| Maximum                      | 13.6  | 20.5  | 26.4  | 27.1  | 25.0  | 19.7  | 13.3  | 25.5               | 27.3                |
| 75% Quartile                 | 11.9  | 19.4  | 24.2  | 26.1  | 23.6  | 18.2  | 11.9  | 25.0               | 26.5                |
| Median                       | 10.8  | 18.0  | 23.5  | 24.7  | 22.9  | 17.5  | 10.7  | 24.1               | 25.3                |
| 25% Quartile                 | 9.1   | 16.8  | 22.3  | 23.4  | 21.8  | 15.8  | 9.5   | 23.4               | 24.7                |
| Minimum                      | 7.6   | 13.6  | 19.3  | 21.8  | 19.8  | 14.4  | 8.0   | 21.2               | 21.9                |
| Mean                         | 10.6  | 17.8  | 23.3  | 24.7  | 22.7  | 17.1  | 10.7  | 24.0               | 25.4                |
| Std. Deviation               | 1.7   | 1.9   | 1.6   | 1.5   | 1.4   | 1.4   | 1.4   | 1.1                | 1.2                 |
| <b>Trout (1981-2017)</b>     |       |       |       |       |       |       |       |                    |                     |
| Maximum                      | 10.0  | 17.8  | 23.3  | 24.4  | 21.9  | 16.9  | 10.6  | 23.4               | 25.6                |
| 75% Quartile                 | 6.7   | 15.6  | 21.3  | 23.1  | 20.9  | 15.8  | 9.3   | 22.3               | 23.8                |
| Median                       | 5.2   | 14.1  | 20.1  | 22.2  | 19.9  | 14.6  | 8.3   | 21.5               | 23.3                |
| 25% Quartile                 | 3.5   | 12.3  | 19.2  | 21.0  | 18.8  | 13.8  | 7.6   | 20.7               | 22.1                |
| Minimum                      | 1.1   | 9.8   | 16.0  | 18.9  | 17.4  | 11.6  | 5.7   | 18.8               | 20.2                |
| Mean                         | 5.0   | 14.1  | 20.1  | 22.2  | 19.9  | 14.6  | 8.5   | 21.4               | 23.0                |
| Std. Deviation               | 2.3   | 2.0   | 1.6   | 1.4   | 1.3   | 1.4   | 1.2   | 1.1                | 1.3                 |
| <b>Sparkling (1981-2017)</b> |       |       |       |       |       |       |       |                    |                     |
| Maximum                      | 12.4  | 18.9  | 23.3  | 24.7  | 23.2  | 18.0  | 11.4  | 23.9               | 25.6                |
| 75% Quartile                 | 9.3   | 16.7  | 22.1  | 24.0  | 21.6  | 16.4  | 9.7   | 22.9               | 24.4                |
| Median                       | 7.1   | 15.7  | 21.4  | 22.7  | 20.7  | 15.3  | 8.8   | 21.9               | 23.7                |
| 25% Quartile                 | 5.0   | 14.3  | 20.1  | 21.5  | 19.4  | 14.3  | 7.9   | 21.3               | 22.6                |
| Minimum                      | 2.2   | 12.1  | 17.3  | 19.8  | 18.8  | 12.5  | 6.7   | 19.7               | 21.4                |
| Mean                         | 6.9   | 15.7  | 21.1  | 22.7  | 20.6  | 15.2  | 8.9   | 22.1               | 23.5                |
| Std. Deviation               | 2.9   | 1.7   | 1.4   | 1.4   | 1.3   | 1.3   | 1.2   | 1.1                | 1.2                 |
| <b>Allequash (1981-2017)</b> |       |       |       |       |       |       |       |                    |                     |
| Maximum                      | 14.6  | 21.5  | 25.6  | 26.4  | 23.2  | 17.5  | 9.6   | 24.6               | 27.5                |
| 75% Quartile                 | 11.3  | 18.2  | 23.2  | 24.2  | 21.4  | 15.1  | 7.8   | 23.2               | 25.0                |
| Median                       | 8.3   | 17.4  | 21.8  | 23.1  | 20.6  | 14.5  | 6.5   | 22.3               | 24.3                |
| 25% Quartile                 | 6.5   | 16.2  | 20.8  | 22.1  | 19.1  | 13.1  | 5.8   | 21.6               | 23.1                |
| Minimum                      | 1.7   | 13.3  | 17.3  | 20.1  | 17.8  | 9.5   | 3.2   | 19.8               | 20.9                |
| Mean                         | 8.5   | 17.5  | 21.8  | 23.1  | 20.4  | 14.1  | 6.7   | 22.3               | 24.1                |
| Std. Deviation               | 3.3   | 1.9   | 1.7   | 1.5   | 1.5   | 1.8   | 1.6   | 1.2                | 1.4                 |

Supplemental Table S1 (cont.)

|                                       | 1-May | 1-Jun | 1-Jul | 1-Aug | 1-Sep | 1-Oct | 1-Nov | July-Aug<br>(mean) | Maximum<br>Recorded |
|---------------------------------------|-------|-------|-------|-------|-------|-------|-------|--------------------|---------------------|
| <b>Trout Bog (1981-2017)</b>          |       |       |       |       |       |       |       |                    |                     |
| Maximum                               | 15.0  | 20.3  | 25.4  | 25.6  | 24.6  | 17.5  | 8.7   | 24.1               | 27.1                |
| 75% Quartile                          | 11.7  | 18.9  | 22.5  | 23.8  | 20.5  | 13.9  | 7.2   | 22.9               | 25.4                |
| Median                                | 9.2   | 17.9  | 21.8  | 23.1  | 19.6  | 12.7  | 6.1   | 21.9               | 24.2                |
| 25% Quartile                          | 6.6   | 16.6  | 20.7  | 21.4  | 18.3  | 12.1  | 5.4   | 20.9               | 23.2                |
| Minimum                               | 1.6   | 13.0  | 17.4  | 19.5  | 15.8  | 9.5   | 2.1   | 18.3               | 21.7                |
| Mean                                  | 8.9   | 17.6  | 21.4  | 22.7  | 19.6  | 13.1  | 6.1   | 21.8               | 24.2                |
| Std. Deviation                        | 3.5   | 1.8   | 1.8   | 1.7   | 2.0   | 1.8   | 1.3   | 1.4                | 1.3                 |
| <b>Stechlinsee (1980-2017)</b>        |       |       |       |       |       |       |       |                    |                     |
| Maximum                               | 13.8  | 18.6  | 22.1  | 25.8  | 22.2  | 17.2  | 13.1  | 22.4               | 25.8                |
| 75% Quartile                          | 10.9  | 17.3  | 20.3  | 22.2  | 19.8  | 15.8  | 11.1  | 21.0               | 22.8                |
| Median                                | 10.2  | 15.8  | 19.2  | 21.0  | 19.1  | 15.1  | 10.3  | 20.2               | 21.9                |
| 25% Quartile                          | 8.8   | 14.7  | 17.8  | 19.8  | 18.7  | 14.4  | 9.7   | 19.2               | 20.6                |
| Minimum                               | 7.3   | 12.7  | 14.6  | 17.5  | 16.5  | 13.2  | 8.4   | 17.0               | 18.3                |
| Mean                                  | 10.1  | 15.9  | 19.0  | 21.0  | 19.1  | 15.1  | 10.4  | 20.1               | 21.8                |
| Std. Deviation                        | 1.6   | 1.6   | 1.7   | 2.0   | 1.3   | 1.1   | 1.3   | 1.4                | 1.8                 |
| <b>Feldberger Haussee (1985-2017)</b> |       |       |       |       |       |       |       |                    |                     |
| Maximum                               | 15.2  | 19.5  | 22.6  | 25.9  | 22.4  | 16.8  | 11.7  | 22.9               | 26.1                |
| 75% Quartile                          | 13.3  | 18.0  | 20.6  | 22.4  | 19.4  | 15.5  | 10.4  | 21.5               | 22.9                |
| Median                                | 12.1  | 17.0  | 19.5  | 21.0  | 18.6  | 14.7  | 9.8   | 20.4               | 22.0                |
| 25% Quartile                          | 10.7  | 15.9  | 18.6  | 19.6  | 17.9  | 14.1  | 9.2   | 19.6               | 21.5                |
| Minimum                               | 8.3   | 13.3  | 16.7  | 17.9  | 16.2  | 13.1  | 7.0   | 17.8               | 18.9                |
| Mean                                  | 12.0  | 16.8  | 19.6  | 21.0  | 18.7  | 14.8  | 9.7   | 20.5               | 22.1                |
| Std. Deviation                        | 1.6   | 1.6   | 1.5   | 1.9   | 1.3   | 1.0   | 1.2   | 1.3                | 1.5                 |
| <b>Pyhäjärvi (1982-2017)</b>          |       |       |       |       |       |       |       |                    |                     |
| Maximum                               | 11.7  | 17.3  | 21.1  | 23.0  | 20.4  | 13.4  | 8.3   | 20.9               | 23.2                |
| 75% Quartile                          | 7.5   | 14.2  | 18.6  | 20.5  | 17.3  | 12.2  | 6.2   | 19.3               | 21.7                |
| Median                                | 5.8   | 12.9  | 17.2  | 19.7  | 16.4  | 11.5  | 5.8   | 18.5               | 20.7                |
| 25% Quartile                          | 1.2   | 12.4  | 16.5  | 18.7  | 15.6  | 10.4  | 3.4   | 18.0               | 19.7                |
| Minimum                               | 0.5   | 7.5   | 14.6  | 17.0  | 13.8  | 8.5   | 1.1   | 16.1               | 17.2                |
| Mean                                  | 5.1   | 13.1  | 17.6  | 19.7  | 16.6  | 11.3  | 4.9   | 18.7               | 20.6                |
| Std. Deviation                        | 3.3   | 2.1   | 1.7   | 1.5   | 1.6   | 1.2   | 2.0   | 1.1                | 1.4                 |
| <b>Konnevesi (1984-2017)</b>          |       |       |       |       |       |       |       |                    |                     |
| Maximum                               | -     | 17.2  | 21.3  | 22.5  | 19.2  | 13.8  | 7.6   | 20.8               | 25.3                |
| 75% Quartile                          | -     | 11.8  | 18.3  | 20.2  | 16.5  | 11.2  | 5.8   | 18.9               | 21.3                |
| Median                                | -     | 10.5  | 16.5  | 19.1  | 15.5  | 10.6  | 5.6   | 17.9               | 20.3                |
| 25% Quartile                          | -     | 9.3   | 15.1  | 17.8  | 14.6  | 9.6   | 4.5   | 17.2               | 19.3                |
| Minimum                               | -     | 7.9   | 13.3  | 16.6  | 12.1  | 6.9   | 2.5   | 15.1               | 16.8                |
| Mean                                  | -     | 10.6  | 16.6  | 19.1  | 15.6  | 10.6  | 5.3   | 17.9               | 20.3                |
| Std. Deviation                        | -     | 2.0   | 2.1   | 1.7   | 1.8   | 1.3   | 1.1   | 1.4                | 1.9                 |
| <b>Kevojärvi (1980-2017)</b>          |       |       |       |       |       |       |       |                    |                     |
| Maximum                               | -     | 12.1  | 18.0  | 18.8  | 13.5  | 8.4   | -     | 16.0               | 19.7                |
| 75% Quartile                          | -     | 6.1   | 14.2  | 16.0  | 12.0  | 6.8   | -     | 14.4               | 17.8                |
| Median                                | -     | 4.3   | 12.7  | 14.7  | 10.9  | 6.0   | -     | 13.7               | 17.1                |
| 25% Quartile                          | -     | 1.1   | 11.3  | 13.5  | 10.2  | 5.2   | -     | 12.9               | 16.1                |
| Minimum                               | -     | 1.1   | 8.3   | 12.4  | 8.6   | 3.4   | -     | 11.2               | 13.9                |
| Mean                                  | -     | 4.5   | 12.7  | 14.9  | 11.1  | 6.0   | -     | 13.7               | 17.1                |
| Std. Deviation                        | -     | 3.3   | 2.3   | 1.8   | 1.3   | 1.2   | -     | 1.1                | 1.4                 |
