# Supplementary material
Source: publisher figshare collection journal article supplement (https://tandf.figshare.com/articles/dataset/_/9970604)

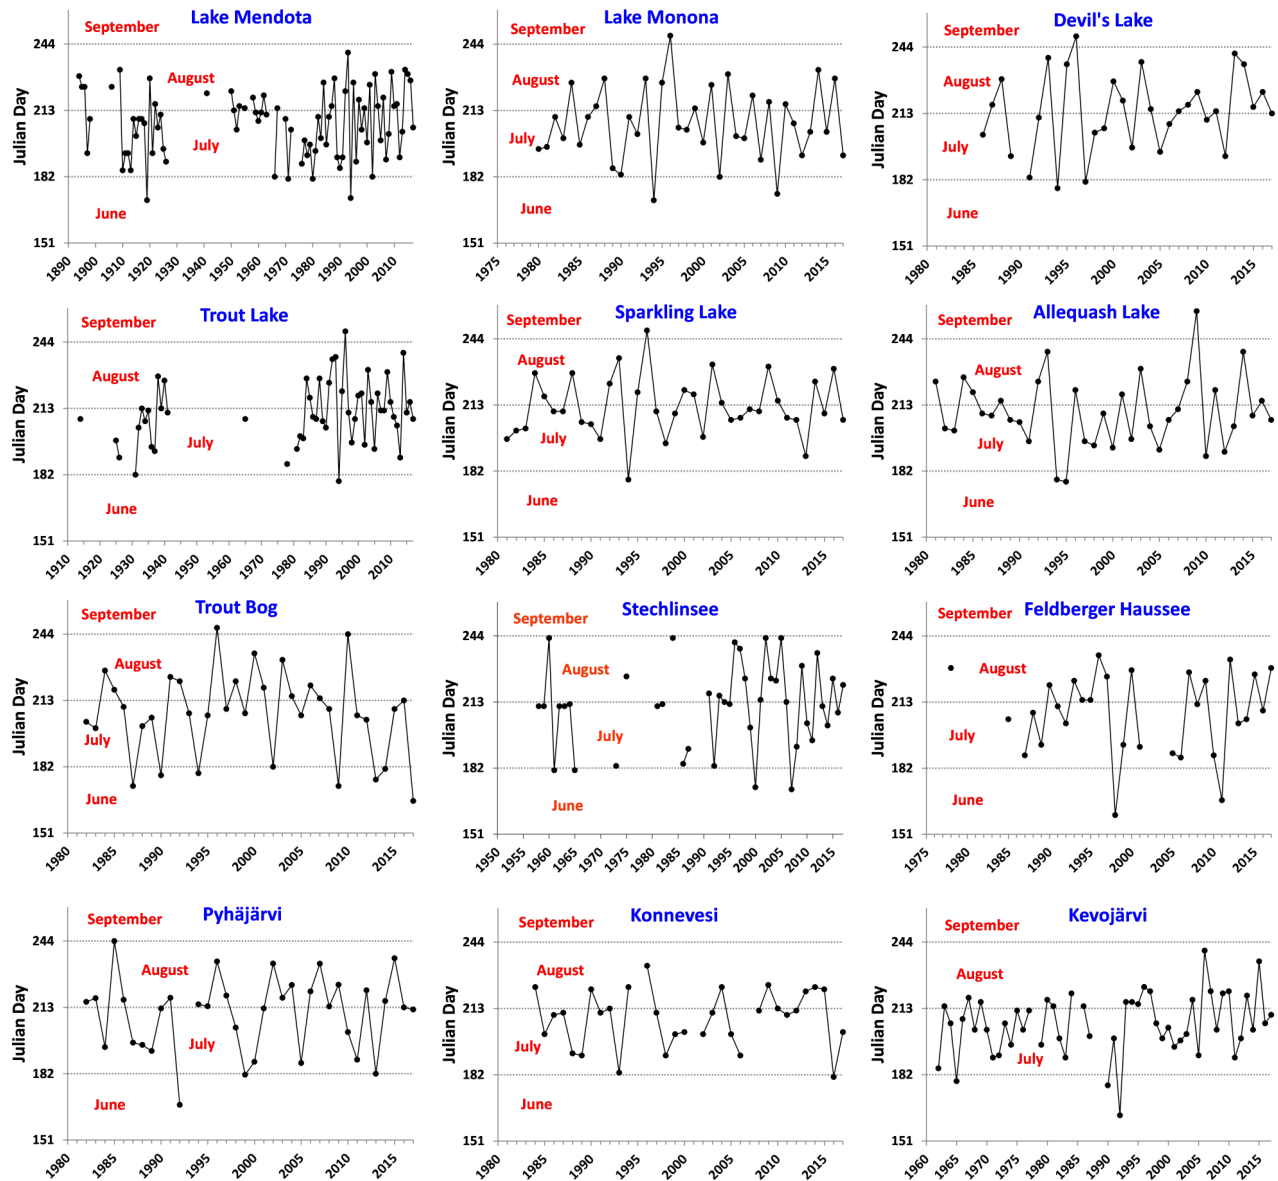

**Supplemental Fig. S2.** Julian day of maximum recorded temperatures for 12 study lakes.

Supplement: Supplementary file 12 [file 1]
